# Supplementary material for: One-Pot Synthesis of W2C/WS2 Hybrid Nanostructures for Improved Hydrogen Evolution Reactions and Supercapacitors
Source: PubMed Central journal article supplement (PMC7466642; doi:10.3390/nano10081597), 2020-08-14
Supplement: nanomaterials-10-01597-s001.pdf [file nanomaterials-10-01597-s001.pdf]

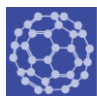

# One-Pot Synthesis of $W_2C/WS_2$ Hybrid Nanostructures for Improved Hydrogen Evolution Reactions and Supercapacitors

Sajjad Hussain <sup>1,2</sup>, Iqra Rabani <sup>2</sup>, Dhanasekaran Vikraman <sup>3</sup>, Asad Feroze <sup>4</sup>, Muhammad Ali <sup>5</sup>, Young-Soo Seo <sup>2</sup>, Hyun-Seok Kim <sup>3</sup>, Seung-Hyun Chun <sup>4</sup> and Jongwan Jung <sup>1,2,\*</sup>

<sup>1</sup> Hybrid Materials Center (HMC), Sejong University, Seoul 05006, Korea; shussainawan@gmail.com

<sup>2</sup> Department of Nano and Advanced Materials Engineering, Sejong University, Seoul 05006, Korea; iqra.rabani@yahoo.com (I.R.); ysseo@sejong.ac.kr (Y.-S.S.)

<sup>3</sup> Division of Electronics and Electrical Engineering, Dongguk University-Seoul, Seoul 04620, Korea; v.j.dhanasekaran@gmail.com (D.V.); hyunseokk@dongguk.edu (H.-S.K.)

<sup>4</sup> Department of Physics, Sejong University, Seoul 05006, Korea; asadferoze55@gmail.com (A.F.); schun@sejong.ac.kr (S.-H.C.)

<sup>5</sup> Center of Research Excellence in Nanotechnology (CENT), King Fahd University of Petroleum and Minerals (KFUPM), Dhahran 31261, Saudi Arabia; muhammadaliaskari@gmail.com

\* Correspondence: jwjung@sejong.ac.kr; Tel: +82-2-3408-3688; Fax: +82-2-3408-4342

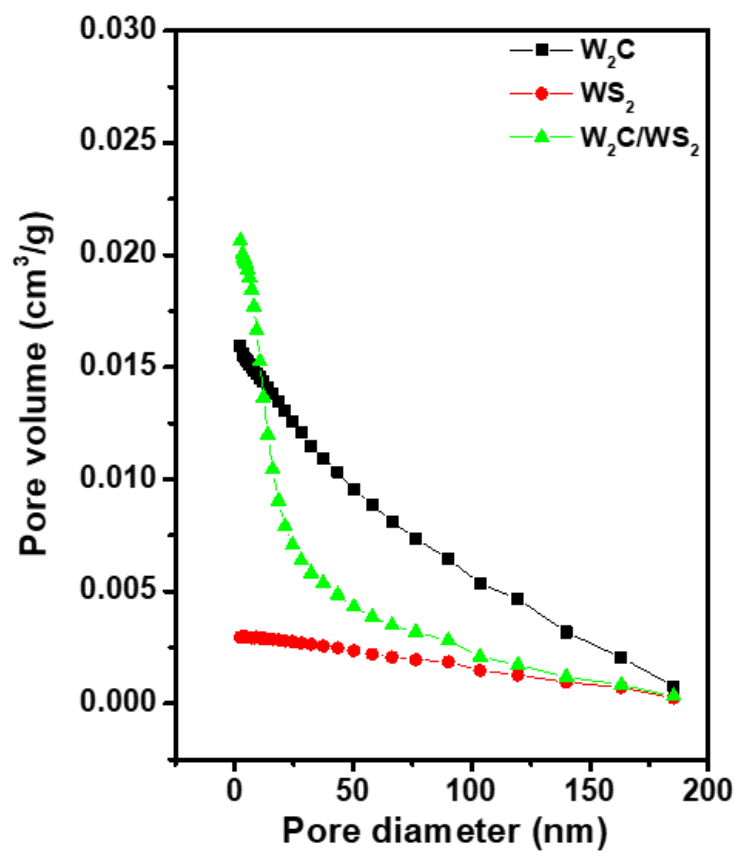

Figure S1. Pore diameter versus pore volume variations for the nanostructures.

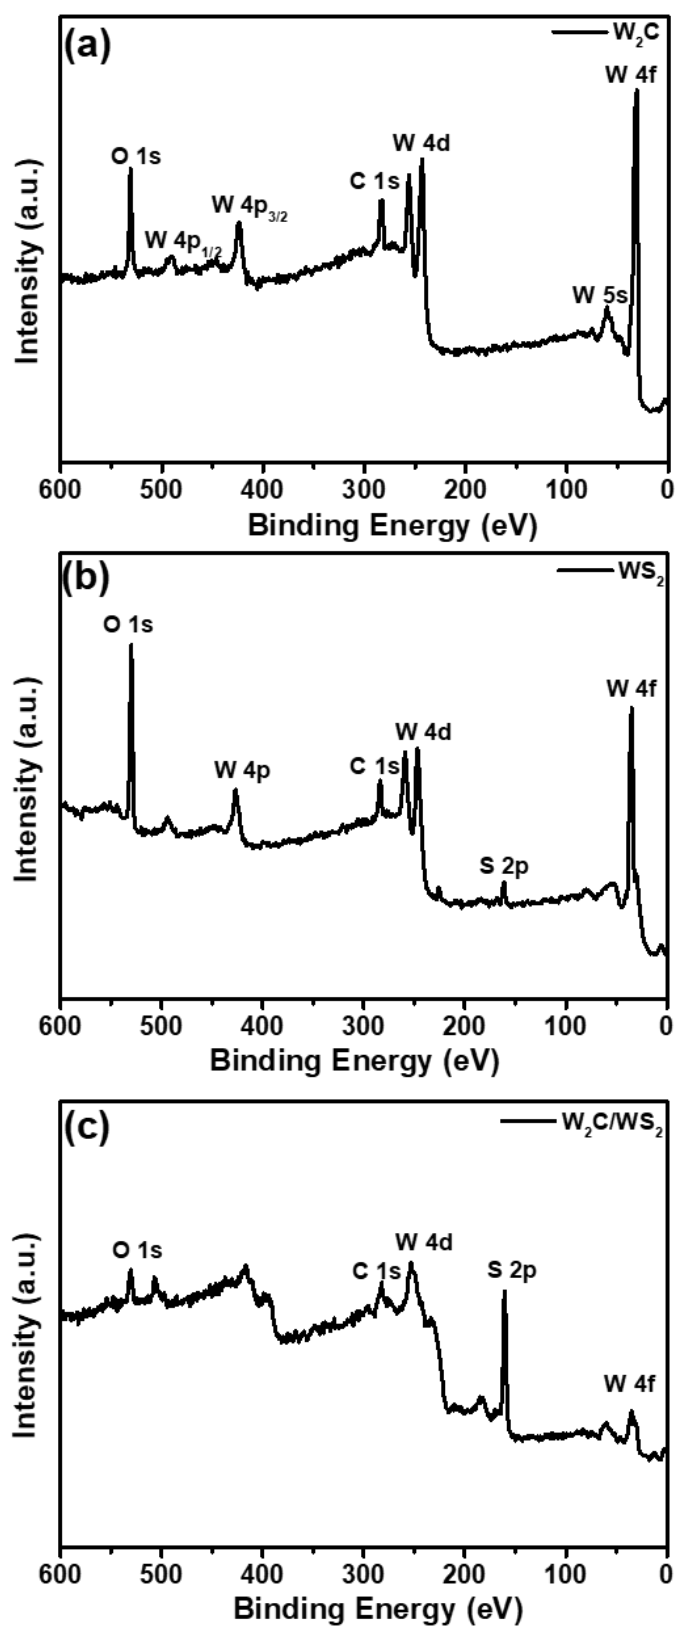

Figure S2. Survey XPS spectrum of (a)  $W_2C$ ; (b)  $WS_2$ ; (c)  $W_2C/WS_2$ .

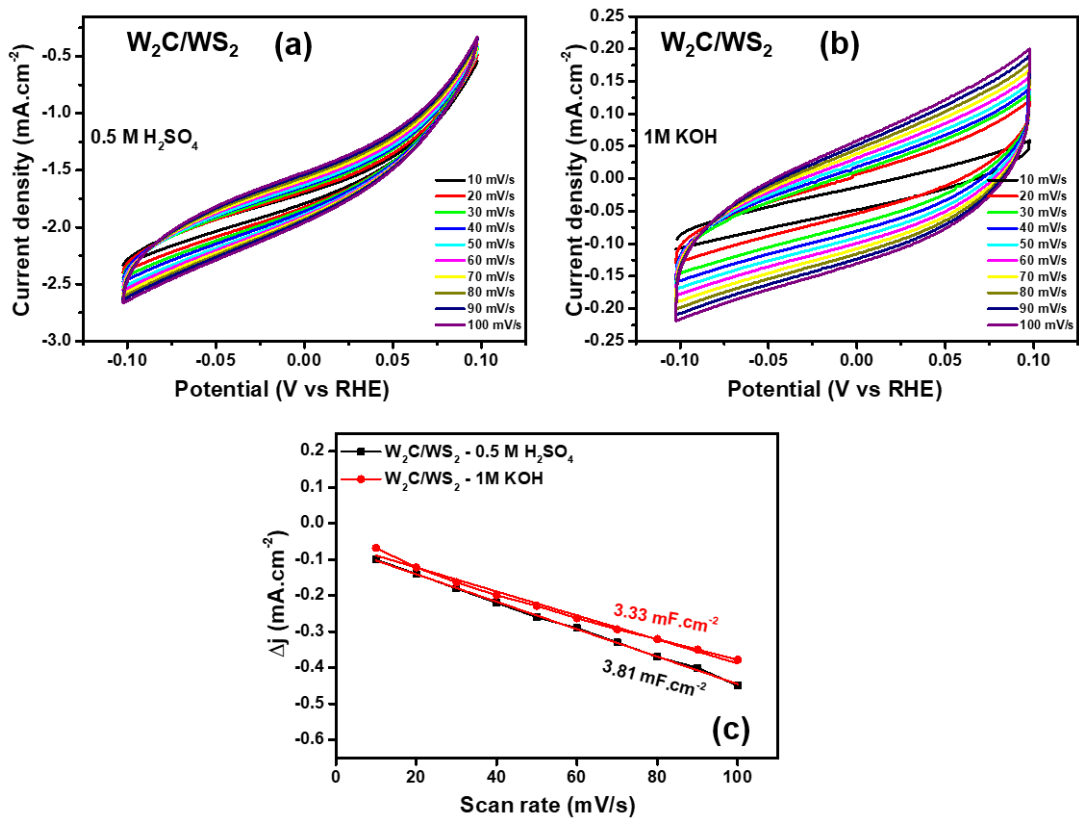

**Figure S3.** CV spectra in the non-Faradaic region with different scan rates for  $W_2C/WS_2$  hybrid HER electrodes in (a)  $0.5\text{ M H}_2\text{SO}_4$  and (b)  $1\text{ M KOH}$  electrolyte and (c) their current differences.

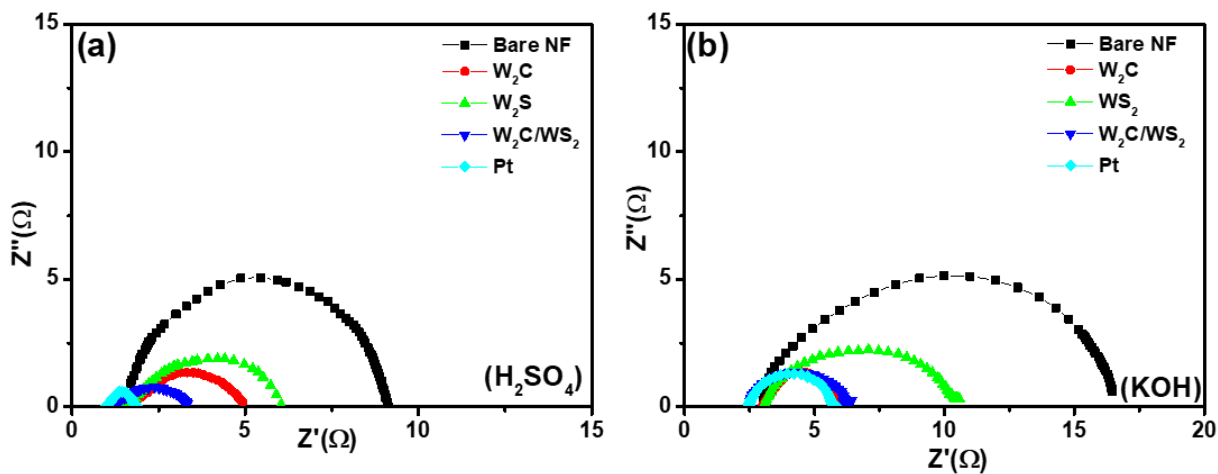

**Figure S4.** EIS spectra of Pt,  $W_2C$ ,  $WS_2$ , and  $W_2C/WS_2$  hybrids electrodes in (a)  $0.5\text{ M H}_2\text{SO}_4$  and (b)  $1\text{ M KOH}$  electrolyte.

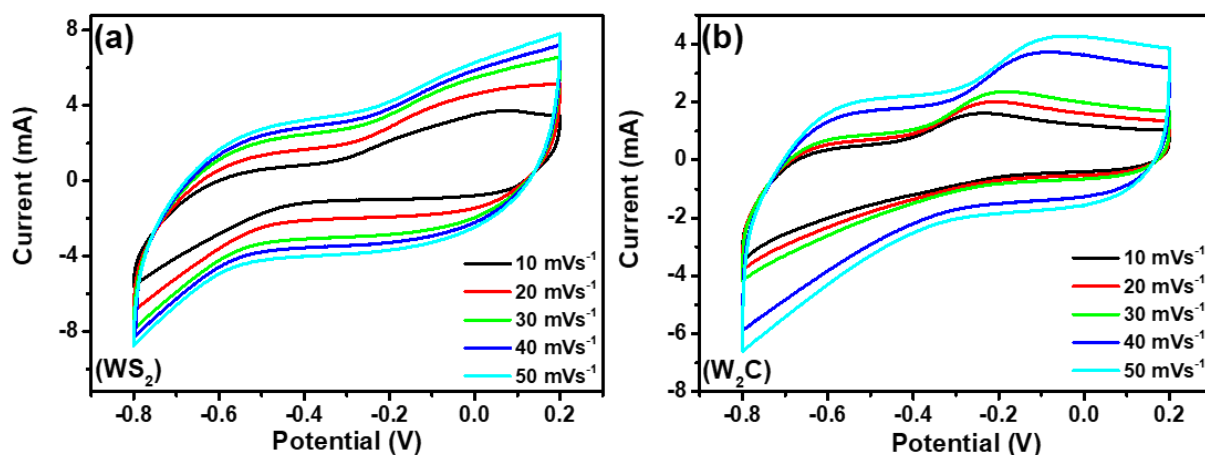

**Figure S5.** CV curves for the (a) WS<sub>2</sub> and (b) W<sub>2</sub>C electrodes at various scan rates using half-cell (10-50 mV s<sup>-1</sup>).

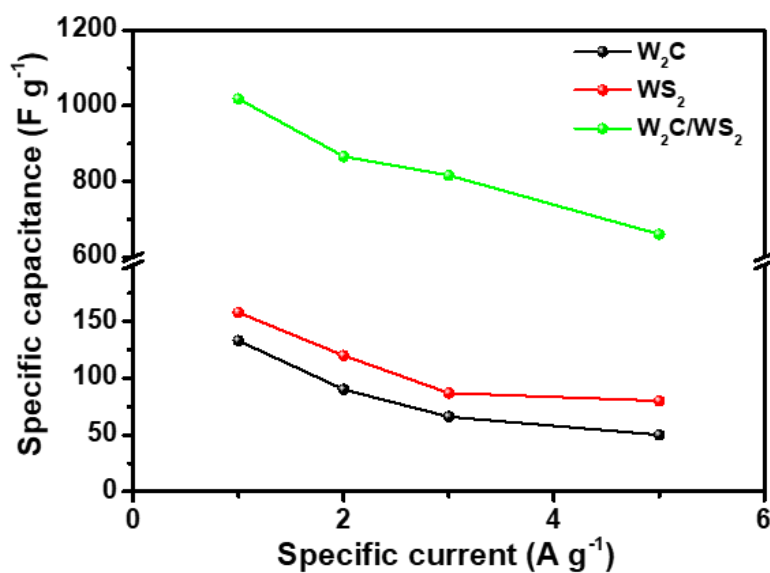

**Figure S6.** The specific capacitance variations at different current densities for W<sub>2</sub>C, WS<sub>2</sub> and W<sub>2</sub>C/WS<sub>2</sub> electrodes by half-cell measurements.

**Table 1.** Microstructural parameters of W<sub>2</sub>C.

| Lattice Plane | FWHM (°) | Crystallite Size (nm) | d-spacing (nm) |
|---------------|----------|-----------------------|----------------|
| 020           | 0.340    | 24.2                  | 3.001          |
| 002           | 0.325    | 25.5                  | 2.601          |
| 220           | 0.352    | 24.7                  | 1.863          |
| 041           | 0.410    | 22.8                  | 1.448          |
| 123           | 0.402    | 23.5                  | 1.415          |
| 004           | 0.486    | 20.3                  | 1.289          |
| 142           | 0.402    | 25.1                  | 1.254          |
| 322           | 0.581    | 17.4                  | 1.232          |

**Table S2.** Microstructural parameters of WS<sub>2</sub>.

| Lattice Plane | FWHM (°) | Crystallite Size (nm) | d-spacing (nm) |
|---------------|----------|-----------------------|----------------|
| 002           | 0.517    | 15.4                  | 6.267          |
| 101           | 1.28     | 6.5                   | 2.690          |
| 103           | 0.201    | 42.0                  | 2.279          |
| 105           | 0.439    | 19.8                  | 1.839          |
| 112           | 0.943    | 9.7                   | 1.532          |
| 114           | 0.486    | 19.5                  | 1.402          |
| 200           | 0.523    | 18.2                  | 1.384          |

**Table 3.** Microstructural parameters of W<sub>2</sub>C/WS<sub>2</sub>.

| Phase            | Lattice Plane | FWHM (°) | Crystallite Size (nm) | d-spacing (nm) |
|------------------|---------------|----------|-----------------------|----------------|
| WS <sub>2</sub>  | 002           | 0.765    | 10.4                  | 6.159          |
|                  | 101           | 1.120    | 7.4                   | 2.714          |
|                  | 103           | 0.956    | 8.8                   | 2.281          |
|                  | 110           | 0.907    | 10.0                  | 1.570          |
| W <sub>2</sub> C | 020           | 0.283    | 29.1                  | 2.981          |
|                  | 002           | 0.341    | 24.4                  | 2.591          |
|                  | 220           | 0.362    | 24.0                  | 1.877          |
|                  | 041           | 0.450    | 20.8                  | 1.450          |
|                  | 123           | 0.444    | 21.2                  | 1.427          |
|                  | 004           | 0.362    | 27.2                  | 1.291          |
|                  | 142           | 0.620    | 16.1                  | 1.256          |
|                  | 322           | 0.575    | 17.6                  | 1.234          |

**Table S4.** Comparison of electrochemical parameters for different electrocatalysts.

| Electrolyte                          | Electrocatalysts                 | Overpotential (mV vs RHE) @ 10 mA·cm <sup>-2</sup> | Tafel Slope (mV·dec <sup>-1</sup> ) | Exchange Current Density (j <sub>0</sub> , mA·cm <sup>-2</sup> ) |
|--------------------------------------|----------------------------------|----------------------------------------------------|-------------------------------------|------------------------------------------------------------------|
| 0.5 M H <sub>2</sub> SO <sub>4</sub> | Pt/C                             | 51                                                 | 36                                  | 1.03                                                             |
|                                      | W <sub>2</sub> C/WS <sub>2</sub> | 133                                                | 70                                  | 1.02                                                             |
|                                      | WS <sub>2</sub>                  | 242                                                | 138                                 | 0.549                                                            |
|                                      | W <sub>2</sub> C                 | 171                                                | 86                                  | 0.194                                                            |
|                                      | Bare NF                          | 450                                                | 168                                 | 0.022                                                            |
| 1 M KOH                              | Pt/C                             | 48                                                 | 48                                  | 1.08                                                             |
|                                      | W <sub>2</sub> C/WS <sub>2</sub> | 105                                                | 84                                  | 0.93                                                             |
|                                      | WS <sub>2</sub>                  | 189                                                | 127                                 | 0.382                                                            |
|                                      | W <sub>2</sub> C                 | 123                                                | 141                                 | 0.717                                                            |
|                                      | Bare NF                          | 292                                                | 148                                 | 0.048                                                            |

**Table S5.** HER catalytic performances TMDs and TMCs-based electrocatalysts.

| Electrocatalyst                                   | Electrolyte                                   | η (mV)                            | Tafel Slope (mV·dec <sup>-1</sup> ) | j <sub>0</sub> (mA·cm <sup>-2</sup> ) | Ref       |
|---------------------------------------------------|-----------------------------------------------|-----------------------------------|-------------------------------------|---------------------------------------|-----------|
| W <sub>2</sub> C/WS <sub>2</sub>                  | 0.5 M H <sub>2</sub> SO <sub>4</sub>          | 133 @ 10 mA/cm <sup>2</sup>       | 70                                  | 1.02                                  | This work |
| W <sub>2</sub> C/WS <sub>2</sub>                  | 1.0 M KOH                                     | 105 @ 10 mA/cm <sup>2</sup>       | 84                                  | 0.93                                  | This work |
| WS <sub>2</sub> /W <sub>2</sub> C heterostructure | 0.5 M H <sub>2</sub> SO <sub>4</sub> & 1M KOH | 126 & 205 @ 10 mA/cm <sup>2</sup> | 68 & 72                             | 0.501                                 | [1]       |
| W-W <sub>2</sub> C/CNT                            | 0.5 M H <sub>2</sub> SO <sub>4</sub> & 1M KOH | 155 & 147 @ 10 mA/cm <sup>2</sup> | 63 & 64                             | -                                     | [2]       |
| p-WC <sub>x</sub> NWs/CC                          | 0.5 M H <sub>2</sub> SO <sub>4</sub> & 1M KOH | 118 & 122 @ 10 mA/cm <sup>2</sup> | 56 & 56                             | 0.165                                 | [3]       |

|                                                                            |                                                   |                                     |             |           |      |
|----------------------------------------------------------------------------|---------------------------------------------------|-------------------------------------|-------------|-----------|------|
| W <sub>2</sub> C@CNT-S hybrid                                              | 0.5 M H <sub>2</sub> SO <sub>4</sub><br>& 1M KOH  | 174 & 148@ 10<br>mA/cm <sup>2</sup> | 57.3 & 56.2 | -         | [4]  |
| Mo <sub>2</sub> C/CNT                                                      | 0.1 M HClO <sub>4</sub>                           | 250@ 10<br>mA/cm <sup>2</sup>       | 251         | 1.43      | [5]  |
| Mo <sub>2</sub> C/Ketjenblack carbon (KB)                                  | 1 M KOH                                           | 210@ 10<br>mA/cm <sup>2</sup>       | 48          | -         | [6]  |
| P-W <sub>2</sub> C@NC                                                      | 0.5 M H <sub>2</sub> SO <sub>4</sub>              | 89@ 10 mA/cm <sup>2</sup>           | 53          | 0.316     | [7]  |
| W/BrN                                                                      | 0.5 M H <sub>2</sub> SO <sub>4</sub><br>& 1M KOH  | 148 & 194@ 10<br>mA/cm <sup>2</sup> | 68 & 72     | -         | [8]  |
| WC/W <sub>2</sub> C heterojunction                                         | 0.5 M H <sub>2</sub> SO <sub>4</sub>              | 69@ 10 mA/cm <sup>2</sup>           | 52          | 0.361     | [9]  |
| Mo <sub>2</sub> C QD/NGCL                                                  | 1 M KOH                                           | 111@ 10<br>mA/cm <sup>2</sup>       | 57.8        | -         | [10] |
| W <sub>x</sub> C@WS <sub>2</sub> Nanostructure                             | 0.5 M H <sub>2</sub> SO <sub>4</sub>              | 146@ 10<br>mA/cm <sup>2</sup>       | 61          | 0.042     | [11] |
| Mo <sub>2</sub> C/N-CNT                                                    | 1 M KOH                                           | 257@ 10<br>mA/cm <sup>2</sup>       | 77          | 10        | [12] |
| W <sub>2</sub> C@GL                                                        | 0.5 M H <sub>2</sub> SO <sub>4</sub>              | 135@ 10<br>mA/cm <sup>2</sup>       | 68          | 0.24      | [13] |
| MoS <sub>2</sub> /Ti <sub>3</sub> C <sub>2</sub> T <sub>x</sub> hybrid     | 0.5 M H <sub>2</sub> SO <sub>4</sub>              | 152@ 10<br>mA/cm <sup>2</sup>       | 70          | 0.6165    | [14] |
| CoS <sub>2</sub> @WS <sub>2</sub>                                          | 0.5 M H <sub>2</sub> SO <sub>4</sub>              | 97.2@ 10<br>mA/cm <sup>2</sup>      | 66          | -         | [15] |
| Carbon coated cobalt– tungsten<br>carbide Co <sub>6</sub> W <sub>6</sub> C | 1 M KOH                                           | 73@ 10 mA/cm <sup>2</sup>           | 25          | -         | [16] |
| MoS <sub>2</sub> /<br>Mo <sub>2</sub> C-NCNTs                              | 0.5 M H <sub>2</sub> SO <sub>4</sub>              | 145@ 10<br>mA/cm <sup>2</sup>       | 69          | 0.021     | [17] |
| WC-CNTs                                                                    | 0.5 M H <sub>2</sub> SO <sub>4</sub><br>& 1M KOH  | 145 & 137@ 10<br>mA/cm <sup>2</sup> | 72 & 106    | -         | [18] |
| MoSSe@rGO composite                                                        | 0.5 M H <sub>2</sub> SO <sub>4</sub>              | 135@5 mA/cm <sup>2</sup>            | 51          |           | [19] |
| Nano MoC@graphite shell                                                    | 0.5 M H <sub>2</sub> SO <sub>4</sub> & 1<br>M KOH | 124 & 77@ 10<br>mA/cm <sup>2</sup>  | 43 & 50     | -         | [20] |
| α-Mo <sub>2</sub> C nanoparticles                                          | 0.5 M H <sub>2</sub> SO <sub>4</sub> & 1<br>M KOH | 198 & 176@ 10<br>mA/cm <sup>2</sup> | 56 & 58     | -         | [21] |
| MoS <sub>2</sub> -Co nanoboxes                                             | 0.5 M H <sub>2</sub> SO <sub>4</sub>              | 155@ 10<br>mA/cm <sup>2</sup>       | 55          | 0.013     | [22] |
| MoC-Mo <sub>2</sub> C HNWs                                                 | 0.5 M H <sub>2</sub> SO <sub>4</sub> & 1<br>M KOH | 126 & 120@ 10<br>mA/cm <sup>2</sup> | 43 & 42     | -         | [23] |
| MoS <sub>2-x</sub> Se <sub>2(1-x)</sub>                                    | 0.5 M H <sub>2</sub> SO <sub>4</sub>              | 188@ 10<br>mA/cm <sup>2</sup>       | 43          | -         | [24] |
| CNT-MoSeS                                                                  | 0.5 M H <sub>2</sub> SO <sub>4</sub>              | 174@ 10<br>mA/cm <sup>2</sup>       | 40          | -         | [25] |
| Mo <sub>2</sub> C@NC                                                       | 0.5 M H <sub>2</sub> SO <sub>4</sub> & 1<br>M KOH | 124 & 60@ 10<br>mA/cm <sup>2</sup>  | 60          | -         | [26] |
| S-MoSe <sub>2</sub> @GGNR hybrids                                          | 0.5 M H <sub>2</sub> SO <sub>4</sub>              | 153@ 10<br>mA/cm <sup>2</sup>       | 46          | -         | [27] |
| 1T/2HMoS <sub>2</sub>                                                      | 0.5 M H <sub>2</sub> SO <sub>4</sub>              | 220@ 10<br>mA/cm <sup>2</sup>       | 61          | 0.443     | [28] |
| N-doped Mo carbide and<br>phosphide<br>Hybrids (N@MoPC <sub>x</sub> )      | 0.5 M H <sub>2</sub> SO <sub>4</sub>              | 108@ 10<br>mA/cm <sup>2</sup>       | 69.4        | 0.3424    | [29] |
| WS <sub>2(1-x)</sub> Se <sub>2x</sub> NTs                                  | 0.5 M H <sub>2</sub> SO <sub>4</sub>              | 298@ 10<br>mA/cm <sup>2</sup>       | 105         | 0.029     | [30] |
| FeS <sub>2</sub> -RGO hybrid                                               | 0.5 M H <sub>2</sub> SO <sub>4</sub>              | 226@ 10<br>mA/cm <sup>2</sup>       | 61          | 0.25-0.65 | [31] |
| Co/N, B co doped ultrathin<br>carbon cages (Co@BCN)                        | 1 M KOH                                           | 183@ 10<br>mA/cm <sup>2</sup>       | 73.2        | 0.103     | [32] |

|                                               |                                                |                                      |             |       |      |
|-----------------------------------------------|------------------------------------------------|--------------------------------------|-------------|-------|------|
| W <sub>2</sub> C/graphene nanoplatelets (GnP) | 0.1m HClO <sub>4</sub>                         | 186@ 10 mA/cm <sup>2</sup>           | 64.7        | 0.024 | [33] |
| N-doped Mo <sub>2</sub> C                     | 0.5 M H <sub>2</sub> SO <sub>4</sub> & 1 M KOH | 177.5 & 160.4@ 10 mA/cm <sup>2</sup> | 59.6 & 48.9 | -     | [34] |

**Table S6.** Performances of TMDs and TMCs-based electrodes for supercapacitors.

| Electrode Materials                                                    | Electrolyte                           | Specific Capacitance                                       | Capacitance Retention (%) / Cycle | Ref       |
|------------------------------------------------------------------------|---------------------------------------|------------------------------------------------------------|-----------------------------------|-----------|
| W <sub>2</sub> C/WS <sub>2</sub> hybrid                                | 1.0 M KOH                             | 1018 F·g <sup>-1</sup> @ 1.0 A·g <sup>-1</sup>             | 94/5000                           | This work |
| WS <sub>2</sub> /RGO hybrids                                           | 1.0 M Na <sub>2</sub> SO <sub>4</sub> | 350 F/g @ 2mV/s                                            | -                                 | [35]      |
| PANI-MoS <sub>2</sub> nanocomposite                                    | 1 M H <sub>2</sub> SO <sub>4</sub>    | 612 Fg <sup>-1</sup> @ 0.2 A g <sup>-1</sup>               | 93/2000                           | [36]      |
| WS <sub>2</sub> -MWCNTs/PANI                                           | 1 M H <sub>2</sub> SO <sub>4</sub>    | 760.1 Fg <sup>-1</sup> @ 1 A g <sup>-1</sup>               | 82.5/2000                         | [37]      |
| VSe <sub>2</sub> /carbon-nanotube                                      |                                       | 1854 uF / cm <sup>2</sup>                                  | 90/10000                          | [38]      |
| TaSe <sub>2</sub> Nanobelts                                            | 1 M KCl                               | 835 mF cm <sup>-2</sup> @ 2 mV s <sup>-1</sup>             | 98.7/10000                        | [39]      |
| MoS <sub>2</sub> -NH <sub>2</sub> /PANI nanosheets                     | 1 M H <sub>2</sub> SO <sub>4</sub>    | 326.4 F g <sup>-1</sup> at 0.5 A g <sup>-1</sup>           | 96.5/10000                        | [40]      |
| MoS <sub>2</sub> and WS <sub>2</sub> nanoparticles                     | 3 M KOH                               | 1531.2 & 1439.5 F g <sup>-1</sup> at 5 mA cm <sup>-2</sup> | 81.6 & 74.4/2000                  | [41]      |
| MXene/polypyrrole composite                                            | 1 M H <sub>2</sub> SO <sub>4</sub>    | 416 F g <sup>-1</sup> at 0.5 A g <sup>-1</sup>             | 86.4/5000                         | [42]      |
| WS <sub>2</sub> QDs                                                    | H <sub>3</sub> PO <sub>4</sub> -PVA   | 28 mF cm <sup>-2</sup> @ 0.1 mA cm <sup>-2</sup>           | 80/10000                          | [43]      |
| MoS <sub>2</sub> /CNS                                                  | 1 M Na <sub>2</sub> SO <sub>4</sub>   | 231 F g <sup>-1</sup> at 1 A g <sup>-1</sup>               | -                                 | [44]      |
| MoS <sub>2</sub> /RCF composite                                        | 1 M Na <sub>2</sub> SO <sub>4</sub>   | 225 F g <sup>-1</sup> at 0.5 A g <sup>-1</sup>             | 81/2000                           | [45]      |
| 1T' -MoTe <sub>2</sub>                                                 | 2 M KOH                               | 1393 F g <sup>-1</sup> at A g <sup>-1</sup>                | 98/1000                           | [46]      |
| MoS <sub>2</sub> /graphene nanobelts                                   | 1 M Na <sub>2</sub> SO <sub>4</sub>   | 445.71 F g <sup>-1</sup> at 0.8 A g <sup>-1</sup>          | 96.7/1000                         | [47]      |
| MoS <sub>2</sub> /rGO                                                  | 1 M H <sub>2</sub> SO <sub>4</sub>    | 306 F g <sup>-1</sup> at 0.5 A g <sup>-1</sup>             | -                                 | [48]      |
| WS <sub>2</sub> /CFC                                                   | 1 M KCl                               | 399 F g <sup>-1</sup> at 1 A g <sup>-1</sup>               | 99/500                            | [49]      |
| WS <sub>2</sub> nanosheets                                             | PVA/LiCl gel                          | 0.93 F cm <sup>-2</sup> at 4 mA cm <sup>-2</sup>           | 82/10000                          | [50]      |
| MoSe <sub>2</sub>                                                      | 2 M KOH                               | 243 F g <sup>-1</sup> at 0.5 A g <sup>-1</sup>             | 90.3/100                          | [51]      |
| VS <sub>2</sub> /MWCNTs                                                | PVA-LiClO <sub>4</sub>                | 182 F g <sup>-1</sup> at 2 mV/s                            | 93.2/5000                         | [52]      |
| MnO <sub>2</sub> /Ti <sub>3</sub> C <sub>2</sub> T <sub>x</sub> hybrid | 1.0 M KOH                             | 212.1 F g <sup>-1</sup> @ 1 A g <sup>-1</sup>              | 88/4000                           | [53]      |

## References

- Li, Y.; Wu, X.; Zhang, H.; Zhang, J. Interface designing over WS<sub>2</sub>/W<sub>2</sub>C for enhanced hydrogen evolution catalysis. *ACS Applied Energy Materials* **2018**, *1*, 3377-3384.
- Hu, Y.; Yu, B.; Ramadoss, M.; Li, W.; Yang, D.; Wang, B.; Chen, Y. Scalable synthesis of heterogeneous W-W<sub>2</sub>C nanoparticles embedded cnt networks for boosted hydrogen evolution reaction in both acidic and alkaline media. *ACS Sustainable Chemistry & Engineering* **2019**, *7*, 10016-10024.
- Ren, B.; Li, D.; Jin, Q.; Cui, H.; Wang, C. Novel porous tungsten carbide hybrid nanowires on carbon cloth for high-performance hydrogen evolution. *Journal of Materials Chemistry A* **2017**, *5*, 13196-13203.
- Hu, Y.; Yu, B.; Li, W.; Ramadoss, M.; Chen, Y. W<sub>2</sub>C nanodot-decorated cnt networks as a highly efficient and stable electrocatalyst for hydrogen evolution in acidic and alkaline media. *Nanoscale* **2019**, *11*, 4876-4884.
- Šljukić, B.; Vujković, M.; Amaral, L.; Santos, D.; Rocha, R.; Sequeira, C.; Figueiredo, J.L. Carbon-supported Mo<sub>2</sub>C electrocatalysts for hydrogen evolution reaction. *Journal of Materials Chemistry A* **2015**, *3*, 15505-15512.



6. Wang, D.; Wang, J.; Luo, X.; Wu, Z.; Ye, L. In situ preparation of Mo<sub>2</sub>C nanoparticles embedded in ketjenblack carbon as highly efficient electrocatalysts for hydrogen evolution. *ACS Sustainable Chemistry & Engineering* **2017**, *6*, 983-990.
7. Yan, G.; Wu, C.; Tan, H.; Feng, X.; Yan, L.; Zang, H.; Li, Y. N-carbon coated PW<sub>2</sub>C composite as efficient electrocatalyst for hydrogen evolution reactions over the whole pH range. *Journal of Materials Chemistry A* **2017**, *5*, 765-772.
8. Li, Q.; Han, C.; Ma, X.; Wang, D.; Xing, Z.; Yang, X. Bromine and nitrogen co-doped tungsten nanoarrays to enable hydrogen evolution at all pH values. *Journal of Materials Chemistry A* **2017**, *5*, 17856-17861.
9. Zhang, L.-N.; Ma, Y.-Y.; Lang, Z.-L.; Wang, Y.-H.; Khan, S.U.; Yan, G.; Tan, H.-Q.; Zang, H.-Y.; Li, Y.-g. Ultrafine cable-like WC/W<sub>2</sub>C heterojunction nanowires covered by graphitic carbon towards highly efficient electrocatalytic hydrogen evolution. *Journal of Materials Chemistry A* **2018**, *6*, 15395-15403.
10. Pu, Z.; Wang, M.; Kou, Z.; Amiin, I.S.; Mu, S. Mo<sub>2</sub>C quantum dot embedded chitosan-derived nitrogen-doped carbon for efficient hydrogen evolution in a broad pH range. *Chemical Communications* **2016**, *52*, 12753-12756.
11. Wang, F.; He, P.; Li, Y.; Shifa, T.A.; Deng, Y.; Liu, K.; Wang, Q.; Wang, F.; Wen, Y.; Wang, Z. Interface engineered W<sub>x</sub>C@WS<sub>2</sub> nanostructure for enhanced hydrogen evolution catalysis. *Advanced Functional Materials* **2017**, *27*, 1605802.
12. Zhang, K.; Zhao, Y.; Fu, D.; Chen, Y. Molybdenum carbide nanocrystal embedded n-doped carbon nanotubes as electrocatalysts for hydrogen generation. *Journal of Materials Chemistry A* **2015**, *3*, 5783-5788.
13. Zhou, Y.; Ma, R.; Li, P.; Chen, Y.; Liu, Q.; Cao, G.; Wang, J. Ditungsten carbide nanoparticles encapsulated by ultrathin graphitic layers with excellent hydrogen-evolution electrocatalytic properties. *Journal of Materials Chemistry A* **2016**, *4*, 8204-8210.
14. Liu, J.; Liu, Y.; Xu, D.; Zhu, Y.; Peng, W.; Li, Y.; Zhang, F.; Fan, X. Hierarchical "nanoroll" like MoS<sub>2</sub>/Ti<sub>3</sub>C<sub>2</sub>T<sub>x</sub> hybrid with high electrocatalytic hydrogen evolution activity. *Applied Catalysis B: Environmental* **2019**, *241*, 89-94.
15. Zhou, X.; Yang, X.; Li, H.; Hedhili, M.N.; Huang, K.-W.; Li, L.-J.; Zhang, W. Symmetric synergy of hybrid CoS<sub>2</sub>-WS<sub>2</sub> electrocatalysts for the hydrogen evolution reaction. *Journal of Materials Chemistry A* **2017**, *5*, 15552-15558.
16. Liu, Y.; Li, G.-D.; Yuan, L.; Ge, L.; Ding, H.; Wang, D.; Zou, X. Carbon-protected bimetallic carbide nanoparticles for a highly efficient alkaline hydrogen evolution reaction. *Nanoscale* **2015**, *7*, 3130-3136.
17. Zhang, K.; Zhao, Y.; Zhang, S.; Yu, H.; Chen, Y.; Gao, P.; Zhu, C. MoS<sub>2</sub> nanosheet/Mo<sub>2</sub>C-embedded n-doped carbon nanotubes: Synthesis and electrocatalytic hydrogen evolution performance. *Journal of Materials Chemistry A* **2014**, *2*, 18715-18719.
18. Fan, X.; Zhou, H.; Guo, X. WC nanocrystals grown on vertically aligned carbon nanotubes: An efficient and stable electrocatalyst for hydrogen evolution reaction. *ACS Nano* **2015**, *9*, 5125-5134.
19. Konkana, B.; Masa, J.; Xia, W.; Muhler, M.; Schuhmann, W. MoSSe@reduced graphene oxide nanocomposite heterostructures as efficient and stable electrocatalysts for the hydrogen evolution reaction. *Nano Energy* **2016**, *29*, 46-53.
20. Shi, Z.; Wang, Y.; Lin, H.; Zhang, H.; Shen, M.; Xie, S.; Zhang, Y.; Gao, Q.; Tang, Y. Porous nanoMoC@graphite shell derived from a MOFs-directed strategy: An efficient electrocatalyst for the hydrogen evolution reaction. *Journal of Materials Chemistry A* **2016**, *4*, 6006-6013.
21. Ma, L.; Ting, L.R.L.; Molinari, V.; Giordano, C.; Yeo, B.S. Efficient hydrogen evolution reaction catalyzed by molybdenum carbide and molybdenum nitride nanocatalysts synthesized via the urea glass route. *Journal of Materials Chemistry A* **2015**, *3*, 8361-8368.
22. Chen, G.; Dong, W.F.; Li, B.L.; Deng, Y.H.; Wang, X.H.; Zhang, X.F.; Luo, H.Q.; Li, N.B. Cobalt incorporated MoS<sub>2</sub> hollow structure with rich out-of-plane edges for efficient hydrogen production. *Electrochimica Acta* **2018**, *276*, 81-91.
23. Lin, H.; Shi, Z.; He, S.; Yu, X.; Wang, S.; Gao, Q.; Tang, Y. Heteronanowires of MoC-Mo<sub>2</sub>C as efficient electrocatalysts for hydrogen evolution reaction. *Chemical science* **2016**, *7*, 3399-3405.
24. Zhen, C.; Zhang, B.; Zhou, Y.; Du, Y.; Xu, P. Hydrothermal synthesis of ternary MoS<sub>2-x</sub>Se<sub>2(1-x)</sub> nanosheets for electrocatalytic hydrogen evolution. *Inorganic Chemistry Frontiers* **2018**, *5*, 1386-1390.
25. Yang, J.; Liu, Y.; Shi, C.; Zhu, J.; Yang, X.; Liu, S.; Li, L.; Xu, Z.; Zhang, C.; Liu, T. Carbon nanotube with vertical 2D molybdenum sulphoselenide nanosheet arrays for boosting electrocatalytic hydrogen evolution. *ACS Applied Energy Materials* **2018**, *1*, 7035-7045.

26. Liu, Y.; Yu, G.; Li, G.D.; Sun, Y.; Asefa, T.; Chen, W.; Zou, X. Coupling Mo<sub>2</sub>C with nitrogen-rich nanocarbon leads to efficient hydrogen-evolution electrocatalytic sites. *Angewandte Chemie International Edition* **2015**, *54*, 10752-10757.
27. Fan, W.; Wang, D.; Sun, Z.; Ling, X.Y.; Liu, T. Graphene/graphene nanoribbon aerogels decorated with s-doped MoSe<sub>2</sub> nanosheets as an efficient electrocatalyst for hydrogen evolution. *Inorganic Chemistry Frontiers* **2019**, *6*, 1209-1216.
28. Liu, Z.; Gao, Z.; Liu, Y.; Xia, M.; Wang, R.; Li, N. Heterogeneous nanostructure based on 1T-phase MoS<sub>2</sub> for enhanced electrocatalytic hydrogen evolution. *ACS applied materials & interfaces* **2017**, *9*, 25291-25297.
29. Huang, Y.; Ge, J.; Hu, J.; Zhang, J.; Hao, J.; Wei, Y. Nitrogen-doped porous molybdenum carbide and phosphide hybrids on a carbon matrix as highly effective electrocatalysts for the hydrogen evolution reaction. *Advanced Energy Materials* **2018**, *8*, 1701601.
30. Xu, K.; Wang, F.; Wang, Z.; Zhan, X.; Wang, Q.; Cheng, Z.; Safdar, M.; He, J. Component-controllable WS<sub>2</sub>(1-x)Se<sub>2x</sub> nanotubes for efficient hydrogen evolution reaction. *Acs Nano* **2014**, *8*, 8468-8476.
31. Jiang, J.; Zhu, L.; Chen, H.; Sun, Y.; Qian, W.; Lin, H.; Han, S. Highly active and stable electrocatalysts of FeS<sub>2</sub>-reduced graphene oxide for hydrogen evolution. *Journal of materials science* **2019**, *54*, 1422-1433.
32. Zhang, H.; Ma, Z.; Duan, J.; Liu, H.; Liu, G.; Wang, T.; Chang, K.; Li, M.; Shi, L.; Meng, X. Active sites implanted carbon cages in core-shell architecture: Highly active and durable electrocatalyst for hydrogen evolution reaction. *ACS Nano* **2015**, *10*, 684-694.
33. Chen, W.F.; Schneider, J.M.; Sasaki, K.; Wang, C.H.; Schneider, J.; Iyer, S.; Iyer, S.; Zhu, Y.; Muckerman, J.T.; Fujita, E. Tungsten carbide-nitride on graphene nanoplatelets as a durable hydrogen evolution electrocatalyst. *ChemSusChem* **2014**, *7*, 2414-2418.
34. Jiang, R.; Fan, J.; Hu, L.; Dou, Y.; Mao, X.; Wang, D. Electrochemically synthesized n-doped molybdenum carbide nanoparticles for efficient catalysis of hydrogen evolution reaction. *Electrochimica Acta* **2018**, *261*, 578-587.
35. Ratha, S.; Rout, C.S. Supercapacitor electrodes based on layered tungsten disulfide-reduced graphene oxide hybrids synthesized by a facile hydrothermal method. *ACS applied materials & interfaces* **2013**, *5*, 11427-11433.
36. Raghu, M.; Kumar, K.Y.; Rao, S.; Aravinda, T.; Prasanna, B.; Prashanth, M. Fabrication of polyaniline-few-layer MoS<sub>2</sub> nanocomposite for high energy density supercapacitors. *Polymer Bulletin* **2018**, *75*, 4359-4375.
37. Gao, J.; Ma, Y.; Li, J.; Fan, J.; Shi, P.; Xu, Q.; Min, Y. Free-standing WS<sub>2</sub>-MWCNTs hybrid paper integrated with polyaniline for high-performance flexible supercapacitor. *Journal of Nanoparticle Research* **2018**, *20*, 298.
38. Wang, C.; Wu, X.; Xu, H.; Zhu, Y.; Liang, F.; Luo, C.; Xia, Y.; Xie, X.; Zhang, J.; Duan, C. VSe<sub>2</sub>/carbon-nanotube compound for all solid-state flexible in-plane supercapacitor. *Applied Physics Letters* **2019**, *114*, 023902.
39. Wang, M.; Zhang, L.; Zhong, Y.; Huang, M.; Zhen, Z.; Zhu, H. In situ electrodeposition of polypyrrole onto TaSe<sub>2</sub> nanobelts quasi-arrays for high-capacitance supercapacitor. *Nanoscale* **2018**, *10*, 17341-17346.
40. Zeng, R.; Li, Z.; Li, L.; Li, Y.; Huang, J.; Xiao, Y.; Yuan, K.; Chen, Y. Covalent connection of polyaniline with MoS<sub>2</sub> nanosheets towards ultrahigh rate capability supercapacitors. *ACS Sustainable Chemistry & Engineering* **2019**, *7*, 11540-11549.
41. Nagaraju, C.; Gopi, C.V.M.; Ahn, J.-W.; Kim, H.-J. Hydrothermal synthesis of MoS<sub>2</sub> and WS<sub>2</sub> nanoparticles for high-performance supercapacitor applications. *New Journal of Chemistry* **2018**, *42*, 12357-12360.
42. Jian, X.; He, M.; Chen, L.; Zhang, M.-m.; Li, R.; Gao, L.-j.; Fu, F.; Liang, Z.-h. Three-dimensional carambola-like MXene/polypyrrole composite produced by one-step co-electrodeposition method for electrochemical energy storage. *Electrochimica Acta* **2019**, *318*, 820-827.
43. Ghorai, A.; Midya, A.; Ray, S.K. Superior charge storage performance of WS<sub>2</sub> quantum dots in a flexible solid state supercapacitor. *New Journal of Chemistry* **2018**, *42*, 3609-3613.
44. Khawula, T.N.; Raju, K.; Franklyn, P.J.; Sigalas, I.; Ozoemena, K.I. Symmetric pseudocapacitors based on molybdenum disulfide (MoS<sub>2</sub>)-modified carbon nanospheres: Correlating physicochemistry and synergistic interaction on energy storage. *Journal of Materials Chemistry A* **2016**, *4*, 6411-6425.
45. Zhao, C.; Zhou, Y.; Ge, Z.; Zhao, C.; Qian, X. Facile construction of MoS<sub>2</sub>/RCF electrode for high-performance supercapacitor. *Carbon* **2018**, *127*, 699-706.
46. Liu, M.; Wang, Z.; Liu, J.; Wei, G.; Du, J.; Li, Y.; An, C.; Zhang, J. Synthesis of few-layer 1T'-MoTe<sub>2</sub> ultrathin nanosheets for high-performance pseudocapacitors. *Journal of Materials Chemistry A* **2017**, *5*, 1035-1042.
47. Jia, Y.; Wan, H.; Chen, L.; Zhou, H.; Chen, J. Hierarchical nanosheet-based MoS<sub>2</sub>/graphene nanobelts with high electrochemical energy storage performance. *Journal of Power Sources* **2017**, *354*, 1-9.

48. Ji, H.; Hu, S.; Jiang, Z.; Shi, S.; Hou, W.; Yang, G. Directly scalable preparation of sandwiched MoS<sub>2</sub>/graphene nanocomposites via ball-milling with excellent electrochemical energy storage performance. *Electrochimica Acta* **2019**, *299*, 143-151.
49. Shang, X.; Chi, J.-Q.; Lu, S.-S.; Gou, J.-X.; Dong, B.; Li, X.; Liu, Y.-R.; Yan, K.-L.; Chai, Y.-M.; Liu, C.-G. Carbon fiber cloth supported interwoven WS<sub>2</sub> nanosplates with highly enhanced performances for supercapacitors. *Applied Surface Science* **2017**, *392*, 708-714.
50. Liu, S.; Zeng, Y.; Zhang, M.; Xie, S.; Tong, Y.; Cheng, F.; Lu, X. Binder-free WS<sub>2</sub> nanosheets with enhanced crystallinity as a stable negative electrode for flexible asymmetric supercapacitors. *Journal of Materials Chemistry A* **2017**, *5*, 21460-21466.
51. Gao, Y.-P.; Huang, K.-J.; Shuai, H.-L.; Liu, L. Synthesis of sphere-feature molybdenum selenide with enhanced electrochemical performance for supercapacitor. *Materials Letters* **2017**, *209*, 319-322.
52. Pandit, B.; Karade, S.S.; Sankapal, B.R. Hexagonal VS<sub>2</sub> anchored MWCNTs: First approach to design flexible solid-state symmetric supercapacitor device. *ACS applied materials & interfaces* **2017**, *9*, 44880-44891.
53. Rakhi, R.B.; Ahmed, B.; Anjum, D.; Alshareef, H.N. Direct chemical synthesis of MnO<sub>2</sub> nanowhiskers on transition-metal carbide surfaces for supercapacitor applications. *ACS applied materials & interfaces* **2016**, *8*, 18806-18814.
